# Supplementary material for: Donor Hepatic Occult Collagen Deposition Predisposes to Peritransplant Stress and Impacts Human Liver Transplantation
Source: PubMed Central journal article supplement — Hepatology. 2021 Aug 30;74(5):2759–73. doi: 10.1002/hep.32030 (PMC9291051; doi:10.1002/hep.32030), 2021-08-30
Supplement: HEP-74-2759-s001.pdf [file HEP-74-2759-s001.pdf]

## **Supplementary Materials**

### **Donor Hepatic Occult Collagen Deposition Predisposes to Peri-transplant Stress and Impacts Human Liver Transplantation**

Hirofumi Hirao<sup>1\*</sup>, Takahiro Ito<sup>1\*</sup>, Kentaro Kadono<sup>1</sup>, Hidenobu Kojima<sup>1</sup>, Bitu V. Naini<sup>2</sup>, Kojiro Nakamura<sup>1,3</sup>, Shoichi Kageyama<sup>1,3</sup>, Ronald W. Busuttil<sup>1</sup>, Jerzy W. Kupiec-Weglinski<sup>1‡</sup>, and Fady M. Kaldas<sup>1‡</sup>

<sup>1</sup> The Dumont-UCLA Transplantation Center, Department of Surgery, Division of Liver and Pancreas Transplantation, David Geffen School of Medicine at University of California, Los Angeles, CA

<sup>2</sup> Department of Pathology, David Geffen School of Medicine at University of California, Los Angeles, CA

<sup>3</sup> Department of Surgery, Division of Hepato-biliary-pancreatic Surgery and Transplantation, Kyoto University, Japan

**Table of contents**

|                                   |               |
|-----------------------------------|---------------|
| <b>Supplemental Figure 1.....</b> | <b>3</b>      |
| <b>Supplemental Figure 2.....</b> | <b>4</b>      |
| <b>Supplemental Figure 3.....</b> | <b>5, 6</b>   |
| <b>Supplemental Figure 4.....</b> | <b>7</b>      |
| <b>Supplemental Figure 5.....</b> | <b>8, 9</b>   |
| <b>Supplemental Table 1.....</b>  | <b>10</b>     |
| <b>Supplemental Table 2.....</b>  | <b>11, 12</b> |

Figure S1

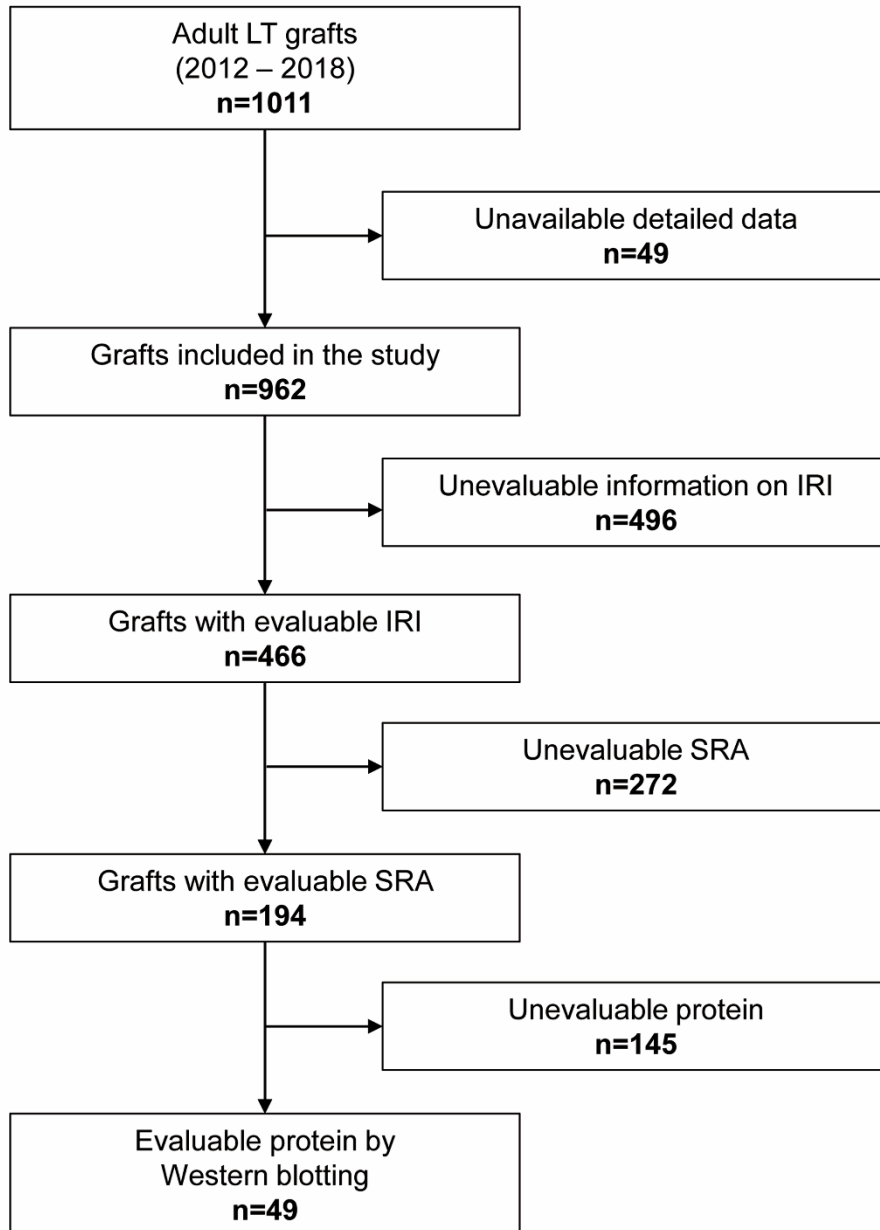

Fig. S1. Flowchart of study population

Among 962 grafts included in this study, IRI severity was evaluated in 466 grafts. Of 466,

194 grafts were available for SRA evaluation. 49 grafts were usable for western blot analysis.

**Figure S2**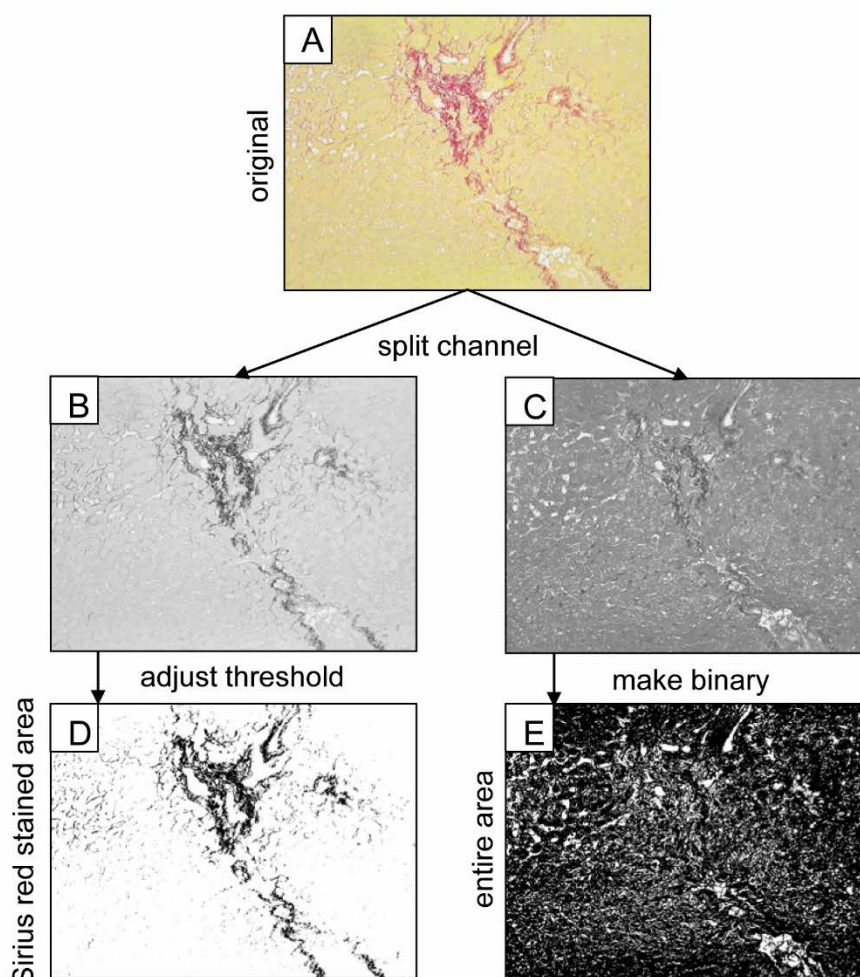**Fig. S2. Analysis of SRA with Image J software**

To calculate the SRA, the original picture A was split into B and C by 'channel split' function. The threshold in picture B was adjusted to extract Sirius red stained area D. To calculate the entire area of the picture, C was converted into E with 'make binary' function. Finally, the black area (D: Sirius red positive area, E: entire area) in each picture was quantified and the SRA (%) was determined by the division of D by E.

Figure S3

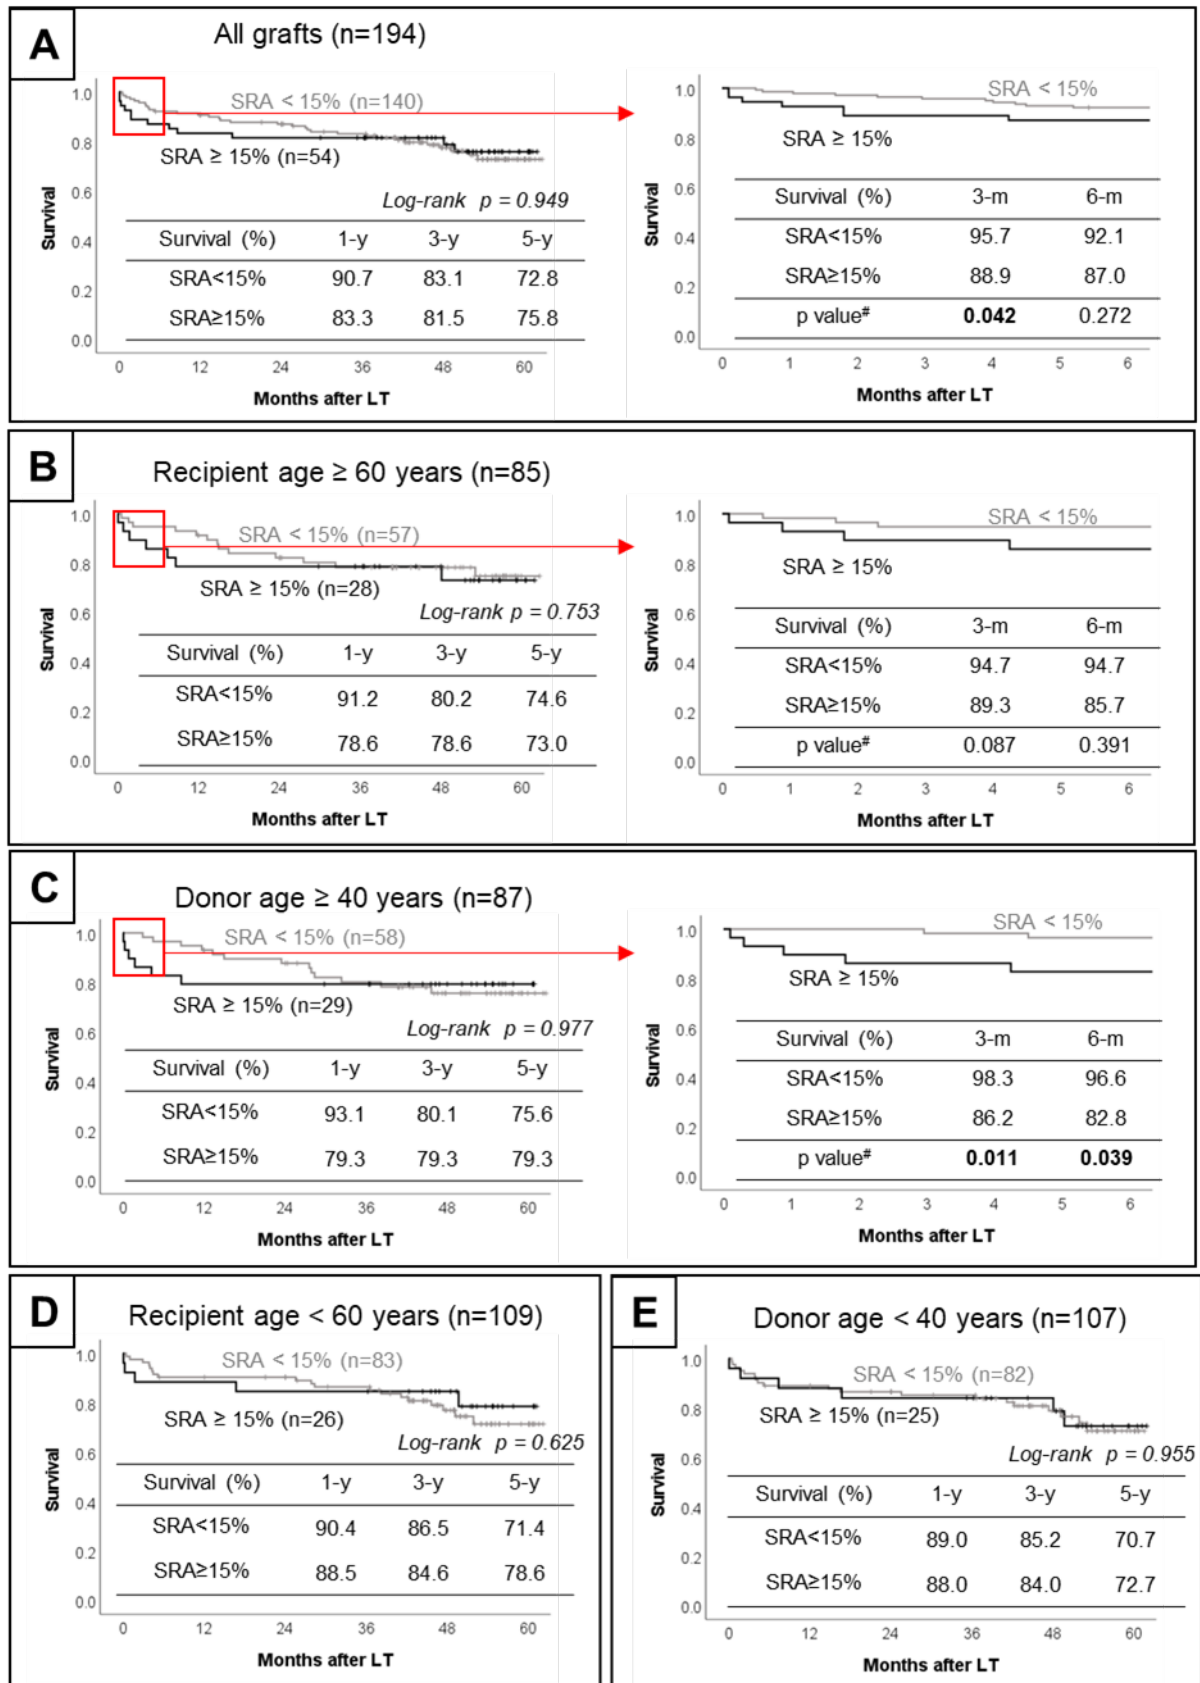

**Fig. S3. Graft survival after LT by SRA**

(A) On Log-rank test in 194 patients, there were no significant differences in graft survival after LT between the two groups; SRA <15% and SRA ≥15%. Survival rate at 3 months after LT showed a significantly higher rate of graft failure in the SRA ≥15% group compared to SRA <15% group ( $p=0.042$ ) by comparing the number of graft failure within each time as binary outcomes. (B) In the group of the recipients older than 60 years, the recipients implanted with high SRA (15% ≥) grafts showed inferior trend of 3 months survival ( $p=0.087$ ). (C) In the sub-group analysis with donor age older than 40 years, the recipients implanted with high SRA (15% ≥) exhibited significantly worse 3 and 6 months graft survival ( $p<0.05$ ). (D, E) There were no differences in short and long term graft survival in sub-group analysis by donor (< 40 years) and recipient (< 60 years) age.

**Figure S4**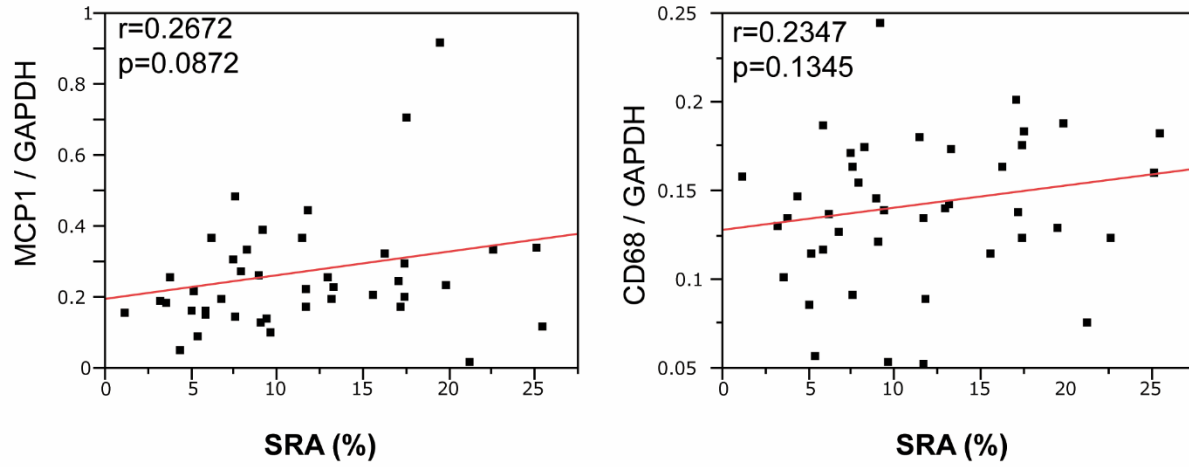**Fig. S4. Correlation between SRA and inflammatory markers**

SRA showed positive trend of correlation with mRNA expressions of MCP1 and CD68 in post-reperfused livers.

Figure S5

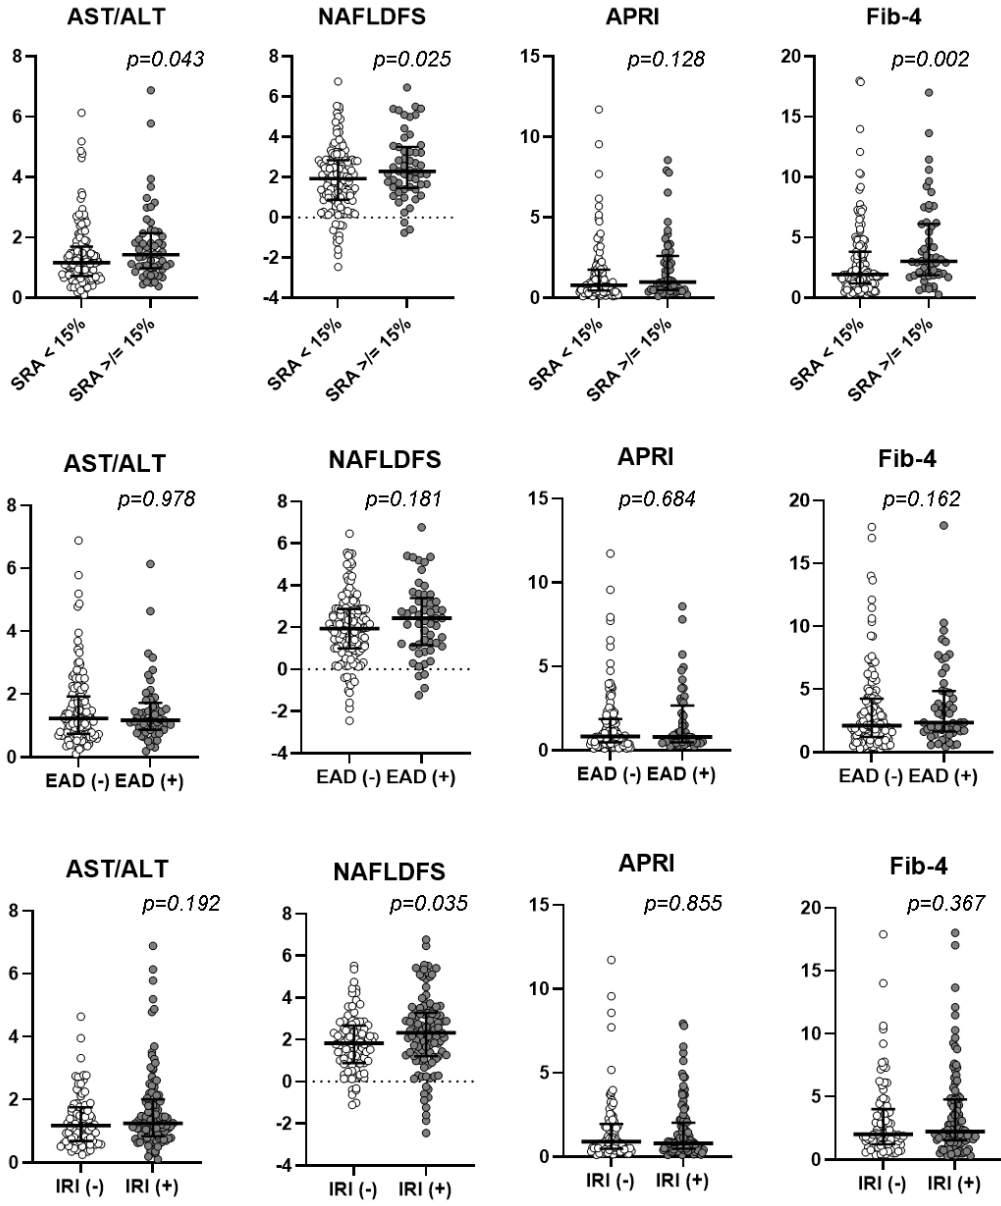

Fig. S5. Relationship between other liver fibrosis scores and SRA, EAD, and IRI in 194 grafts

When comparing grafts with SRA <15% vs SRA  $\geq$ 15%, AST/ALT ratio, NAFLD fibrosis score (NAFLDFS), and Fibrosis-4 (Fib-4) were significantly higher in grafts with SRA  $\geq$ 15%.

Comparisons between EAD vs no EAD grafts and mild to severe IRI vs no or minimal IRI grafts



showed no statistical differences between the two groups ( $p > 0.05$ ), except for NAFLDFS for IRI ( $p = 0.035$ ). P values were from Mann–Whitney U test.

**Table S1: Severity of ischemia-reperfusion injury (IRI)**

| <b>Severity of IRI</b> |                                                                             |
|------------------------|-----------------------------------------------------------------------------|
| <b>No</b>              | None                                                                        |
| <b>Minimal</b>         | PMNs in sinusoidal zone 3 with rare hepatocellular necrosis (A)             |
| <b>Mild</b>            | PMNs in sinusoidal zone 3 with $\geq 1$ cluster of necrotic hepatocytes (B) |
| <b>Moderate</b>        | Clusters of hepatocellular necrosis in $> 50\%$ of lobules (C)              |
| <b>Severe</b>          | 60% of parenchyma or panlobular necrosis in $> 1$ lobule (D)                |

**Table S2: Comparison of grafts with EAD vs Non-EAD**

| Variables                         | Non-EAD<br>n=141 | EAD<br>n=53             | p value      |
|-----------------------------------|------------------|-------------------------|--------------|
| <b>Recipient factors</b>          |                  |                         |              |
| Age (years)                       | 59 (18-78)       | 59 (24-73)              | 0.601        |
| Gender (Female / Male)            | 48 / 93          | 19 / 34                 | 0.814        |
| BMI (kg/m <sup>2</sup> )          | 26.8 (16.9-47.5) | 26.8 (16.1-41.1)        | 0.978        |
| <b>Comorbidity</b>                |                  |                         |              |
| DM                                | 48 (34.0)        | 17 (32.1)               | 0.796        |
| HTN                               | 62 (44.0)        | 22 (41.5)               | 0.758        |
| CAD                               | 25 (17.7)        | 10 (18.9)               | 0.854        |
| <b>Underlying liver disease</b>   |                  |                         |              |
| HBV                               | 5 (3.5)          | 4 (7.5)                 |              |
| HCV                               | 61 (43.3)        | 16 (30.2)               |              |
| EtOH                              | 26 (18.4)        | 8 (15.1)                |              |
| NASH                              | 15 (10.6)        | 9 (17.0)                | 0.237        |
| ALF                               | 8 (5.7)          | 4 (7.5)                 |              |
| PBC                               | 5 (3.5)          | 0                       |              |
| Others                            | 21 (14.9)        | 12 (22.6)               |              |
| Preoperative hospital stay (days) | 5 (0-168)        | 3 (0-136)               | 0.399        |
| Preoperative ICU admission        | 79 (56.0)        | 22 (41.5)               | 0.071        |
| <b>Laboratory data at LT</b>      |                  |                         |              |
| AST (IU/l)                        | 66 (18-6705)     | 62 (24-2614)            | 0.793        |
| ALT (IU/l)                        | 34 (8-5025)      | 38 (9-6850)             | 0.440        |
| Laboratory MELD                   | 31.7 (6.4-45.5)  | 29.0 (6.4-46.2)         | 0.400        |
| <b>Donor factors</b>              |                  |                         |              |
| Age (years)                       | 35 (13-74)       | 38 (18-72)              | 0.101        |
| Gender (Female / Male)            | 58 / 83          | 22 / 31                 | 0.962        |
| <b>BMI (kg/m<sup>2</sup>)</b>     | 25.7 (17.3-53.0) | <b>29.2 (18.1-38.4)</b> | <b>0.013</b> |
| <b>Comorbidity</b>                |                  |                         |              |
| DM                                | 9 (6.4)          | 7 (13.2)                | 0.124        |
| <b>HTN</b>                        | 31 (22.0)        | <b>19 (35.8)</b>        | <b>0.049</b> |
| CAD                               | 9 (6.4)          | 1 (1.9)                 | 0.293        |
| <b>Cause of death</b>             |                  |                         |              |
| Trauma                            | 51 (36.2)        | 20 (37.7)               |              |
| CVS                               | 44 (31.2)        | 22 (41.5)               | 0.352        |
| Anoxia                            | 43 (30.5)        | 11 (20.8)               |              |

|                                                      |               |                      |              |
|------------------------------------------------------|---------------|----------------------|--------------|
| Others                                               | 3 (2.1)       | 0                    |              |
| Laboratory data at procurement                       |               |                      |              |
| AST (IU/l)                                           | 36 (9-483)    | 37 (9-403)           | 0.139        |
| ALT (IU/l)                                           | 31 (8-730)    | 37 (9-403)           | 0.209        |
| DCD                                                  | 5 (3.5)       | 5 (3.5)              | 0.098        |
| HCV Ab positive                                      | 5 (3.5)       | 0                    | 0.326        |
| <b>Cold ischemia time (min)</b>                      | 419 (138-794) | <b>500 (181-878)</b> | <b>0.010</b> |
| Warm ischemia time (min)                             | 48 (23-79)    | 50 (35-78)           | 0.107        |
| <b>Large droplet steatosis <math>\geq</math> 30%</b> | 2 (1.4)       | <b>6 (11.3)</b>      | <b>0.006</b> |
| <b>High-SRA <math>\geq</math> 15%</b>                | 33 (23.4)     | <b>21 (39.6)</b>     | <b>0.025</b> |

---

ALF: acute liver failure, BMI: body mass index, CAD: coronary artery disease, CVS: cerebrovascular stroke, DCD: donor after cardiac death, DM: diabetes mellitus, EtOH: alcoholic (ethanol) related liver disease, HBV: hepatitis B virus, HCV: hepatitis C virus, HTN: hypertension, MELD: model for end-stage liver disease NASH: Non-alcoholic steatohepatitis, PBC: primary biliary cholangitis
